# Supplementary material for: Fabrication of mesoporous metal oxide coated-nanocarbon hybrid materials via a polyol-mediated self-assembly process
Source: Royal Society of Chemistry journal article supplement (doi:10.1039/c4nr04254a), 2014-01-01
Supplement: c4nr04254a1.pdf [file c4nr04254a1.pdf]

ARTICLE

Supporting Information

## Fabrication of mesoporous metal oxide coated-nano carbon hybrid materials via a polyol-mediated self-assembly process

Bingmei Feng,<sup>1</sup> Huixin Wang,<sup>1</sup> Dongniu Wang,<sup>1</sup> Huilong Yu,<sup>2</sup> Yi Chu,<sup>1</sup> Hai-Tao FANG<sup>1\*</sup>

Table S1. Influence of polar molecules on the precipitation time and product quantity of the Ti glycolate.

| Polar molecule                  | Precipitation time<br>(min) | Reaction time<br>(h) | Product quantity<br>(g) |
|---------------------------------|-----------------------------|----------------------|-------------------------|
| Water ( $\epsilon=80.4$ )       | 1                           | 1                    | 0.43                    |
| Formic acid ( $\epsilon=58.5$ ) | 240                         | 13                   | 0.05                    |

Table S2. Influence of water content on the precipitation time and product quantity of the Ti glycolate.

| Water content<br>(ml) | Precipitation time<br>(s) | Reaction time<br>(h) | Product quantity<br>(g) |
|-----------------------|---------------------------|----------------------|-------------------------|
| 0                     | >78h                      | 102                  | 0.03                    |
| 3                     | 600                       | 1                    | 0.43                    |
| 6                     | 60                        | 1                    | 0.44                    |
| 12                    | 34                        | 1                    | 0.42                    |
| 24                    | 47                        | 1                    | 0.14                    |
| Pure water            | --                        | --                   | --                      |

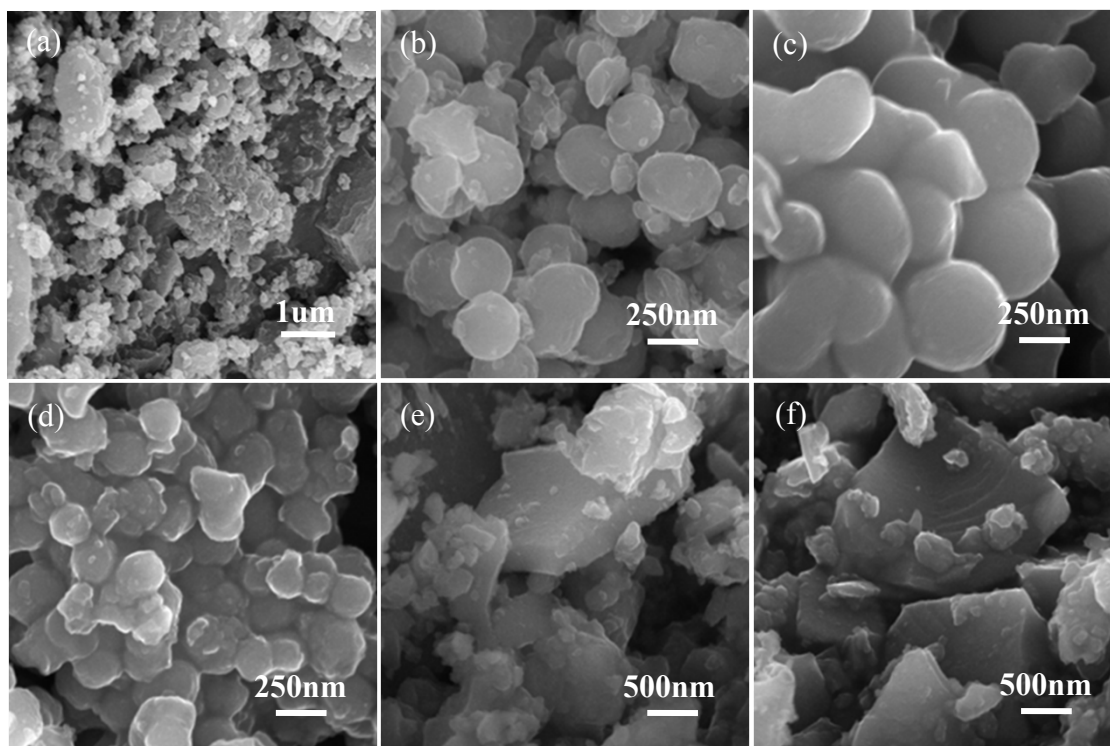

**Figure S1.** SEM images of the Ti glycolate prepared with (a) 6ml formic acid, (b-f) 0ml, 3ml, 6ml, 12ml and 24ml water in acetone bath, respectively.

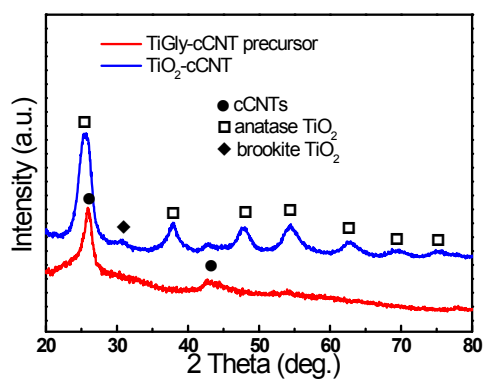

**Figure S2.** XRD spectra of the TiGly-cCNT precursor and its hydrolysis product. Clearly, after the hydrolytic decomposition in boiling water for 1h, the amorphous Ti glycolate is converted into anatase TiO<sub>2</sub>.

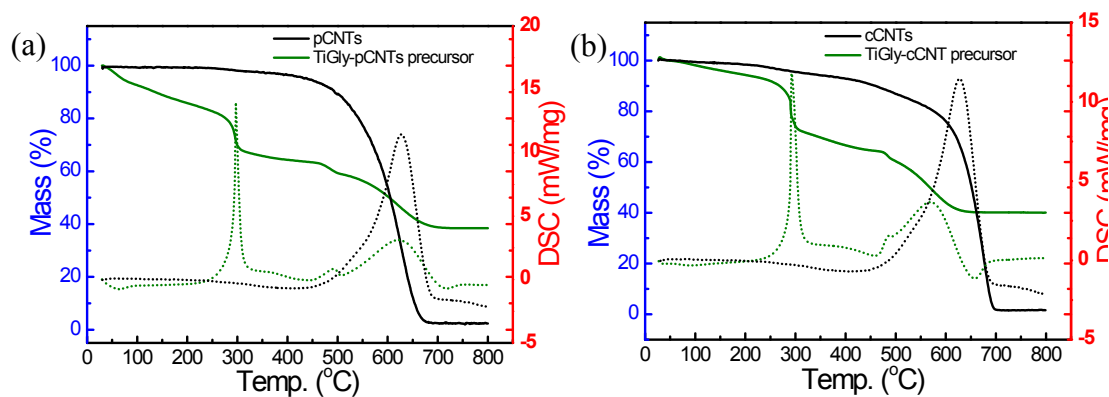

**Figure S3.** TG-DSC curves of (a) the pCNTs and TiGly-pCNT precursor and (b) the cCNTs and TiGly-cCNT precursor.

### Synthesis and Results of the $m\text{SnO}_2$ -cCNT and $m\text{Cu}_2\text{O}/\text{CuO}$ -cCNT

**Synthesis of the  $m\text{SnO}_2$ -cCNT:** 0.3 g stannous oxalate and 100 ml ethylene glycolate were refluxed at 85 °C for 24 h to prepare a Sn glycolate polymer solution. Then this polymer solution was poured to the acetone bath containing 170 mL acetone, 6 mL water and 0.1 g cCNTs for 1 h to prepare Sn glycolate coated-carboxylated CNT (denoted as SnGly-cCNT) precursor. The  $m\text{SnO}_2$ -cCNT was obtained by a pyrolytic decomposition of SnGly-cCNT precursor at 350 °C under air atmosphere for 2 h.

**Synthesis of the  $m\text{Cu}_2\text{O}/\text{CuO}$ -cCNT:** 0.5 g copper acetate and 50 ml ethylene glycolate were refluxed at 85 °C for 1 h to prepare a Cu glycolate polymer solution. Then the Cu glycolate coated-carboxylated CNT (denoted as CuGly-cCNT) precursor was obtained after mixing this polymer solution to an acetone bath for 1 h. The acetone bath contained 170 ml acetone, 24 ml water and 0.05 g cCNTs. The  $m\text{Cu}_2\text{O}/\text{CuO}$ -cCNT was obtained by a pyrolytic decomposition of CuGly-cCNT precursor at 300 °C under air atmosphere for 2 h.

The SnGly-cCNT and CuGly-cCNT precursors are firstly obtained respectively by the similar process of TiGly-cCNT. TG-DSC curves (Figure S4a, 4b) of these two precursors and XRD spectra (Figure S4c, 4d) of the pyrolysis decomposition products definitely demonstrate the conversion of Sn and Cu glycolates

into rutile  $\text{SnO}_2$  and a mixture of  $\text{Cu}_2\text{O}$  with  $\text{CuO}$ , respectively. Note that the temperature shifts of cCNTs oxidation for SnGly-cCNT and CuGly-cCNT precursors are 62 °C and 130 °C, respectively. These remarkable reductions indirectly prove the uniformity of the two precursors.

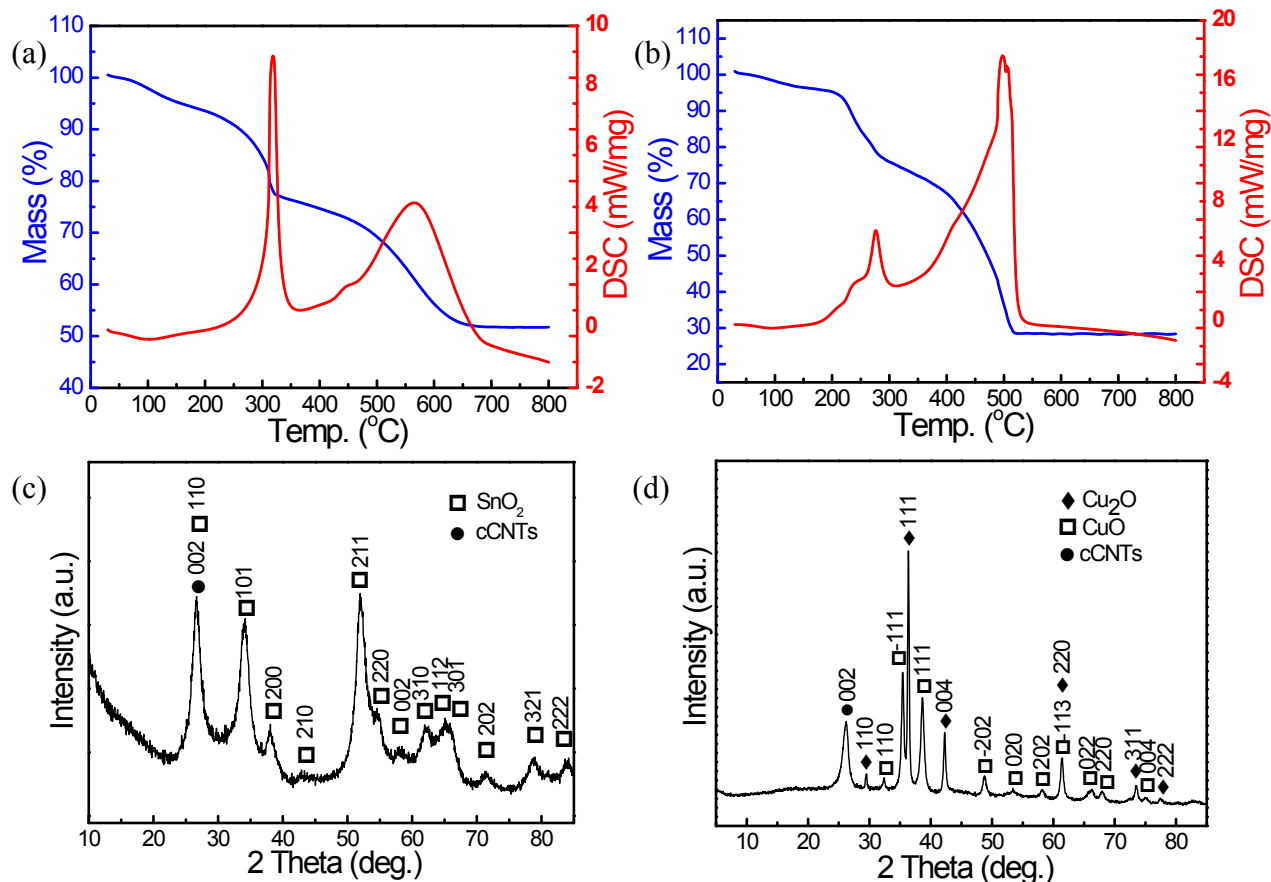

**Figure S4.** TG-DSC curves of (a) the SnGly-cCNT and (b) the CuGly-cCNT precursors. XRD spectra of (c) the mSnO<sub>2</sub>-cCNT and (d) the mCu<sub>2</sub>O/CuO-cCNT.

Figure S5a is the SEM image of the SnGly-cCNT precursor. Similar with the morphology of the TiGly-cCNT, only 1-dimensional structures without Sn glycolate spheres are observed. The TEM and HRTEM images of the mSnO<sub>2</sub>-cCNT (Figure S5b, 5c) display that each cCNT is coated by a layer of interconnected SnO<sub>2</sub> nanoparticles. The size of the SnO<sub>2</sub> nanoparticles is smaller than 10 nm, and the thickness of the coating layer is about 7 nm. The morphology characterization of the CuGly-cCNT precursor and the mCu<sub>2</sub>O/CuO-cCNT shown in Figure S5d-5f clearly indicate a thin deposition layer of Cu<sub>2</sub>O/CuO

nanoparticles. The porous structure of the  $m\text{SnO}_2\text{-cCNT}$  and  $m\text{Cu}_2\text{O/CuO-cCNT}$  are shown in Figure S5g, 5h, respectively. An enhancement of BJH pore size distribution in 2-7 nm after coating cCNTs with  $\text{SnO}_2$  or  $\text{Cu}_2\text{O/CuO}$  also proves the mesoporous nature of the metal oxide coatings. Small clearances among nanocrystals of the coatings contribute to the increase of mesopores. The BET specific area of the  $m\text{SnO}_2\text{-cCNT}$  and  $m\text{Cu}_2\text{O/CuO-cCNT}$  are  $60.5\text{ m}^2/\text{g}$  and  $51.9\text{ m}^2/\text{g}$ , respectively.

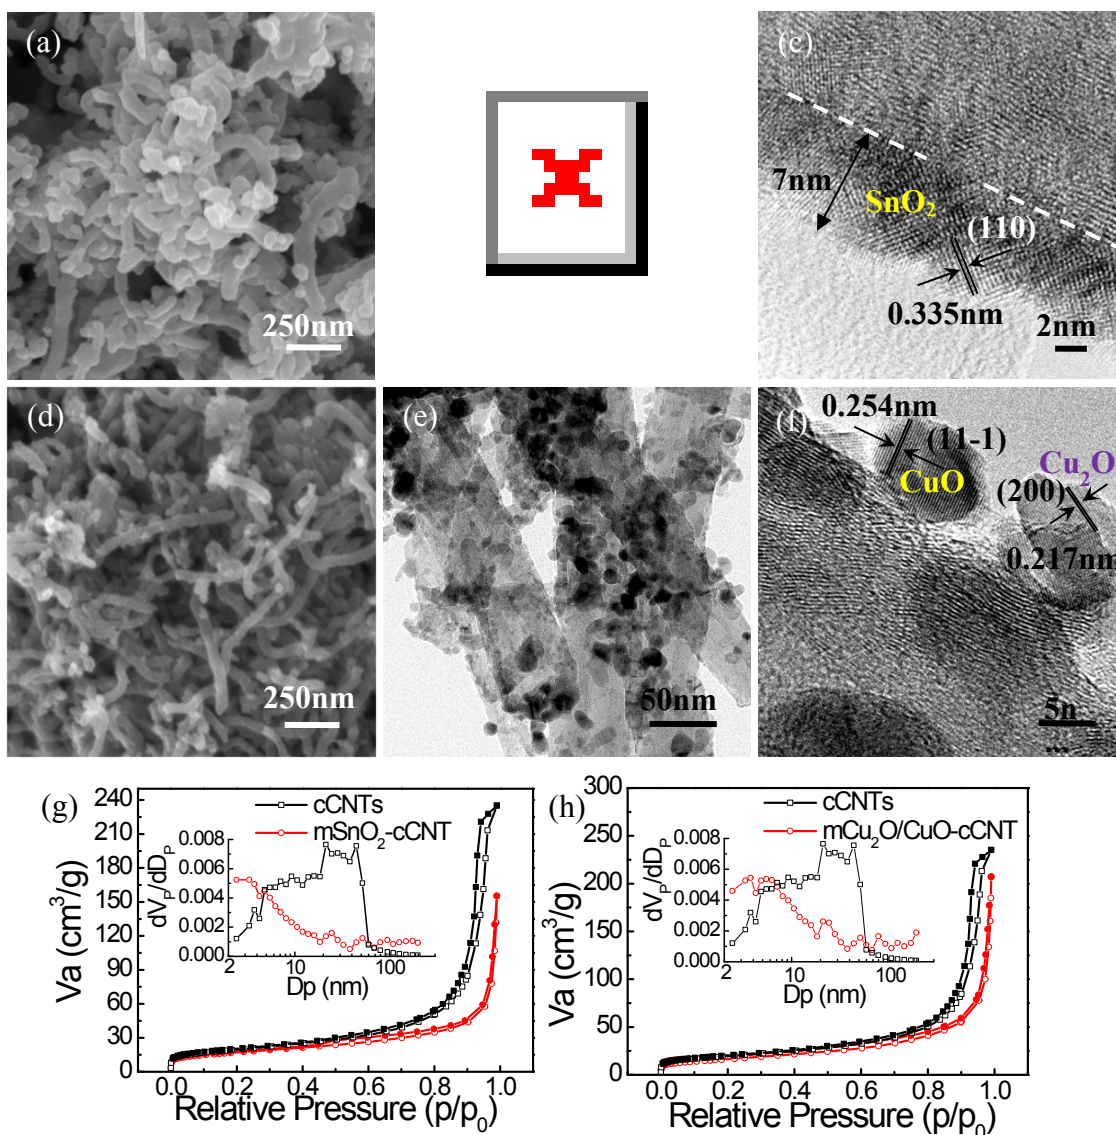

**Figure S5.** (a) SEM image of the SnGly-cCNT precursor. (b) TEM image and (c) HRTEM image of the  $m\text{SnO}_2\text{-cCNT}$ . (d) SEM image of the CuGly-cCNT precursor. (e) TEM image and (f) HRTEM image of the

mCu<sub>2</sub>O/CuO-cCNT. N<sub>2</sub> adsorption-desorption curves and BJH pore size distribution curves (insert) of (g) the cCNTs and mSnO<sub>2</sub>-cCNT and (h) the cCNTs and mCu<sub>2</sub>O/CuO-cCNT.

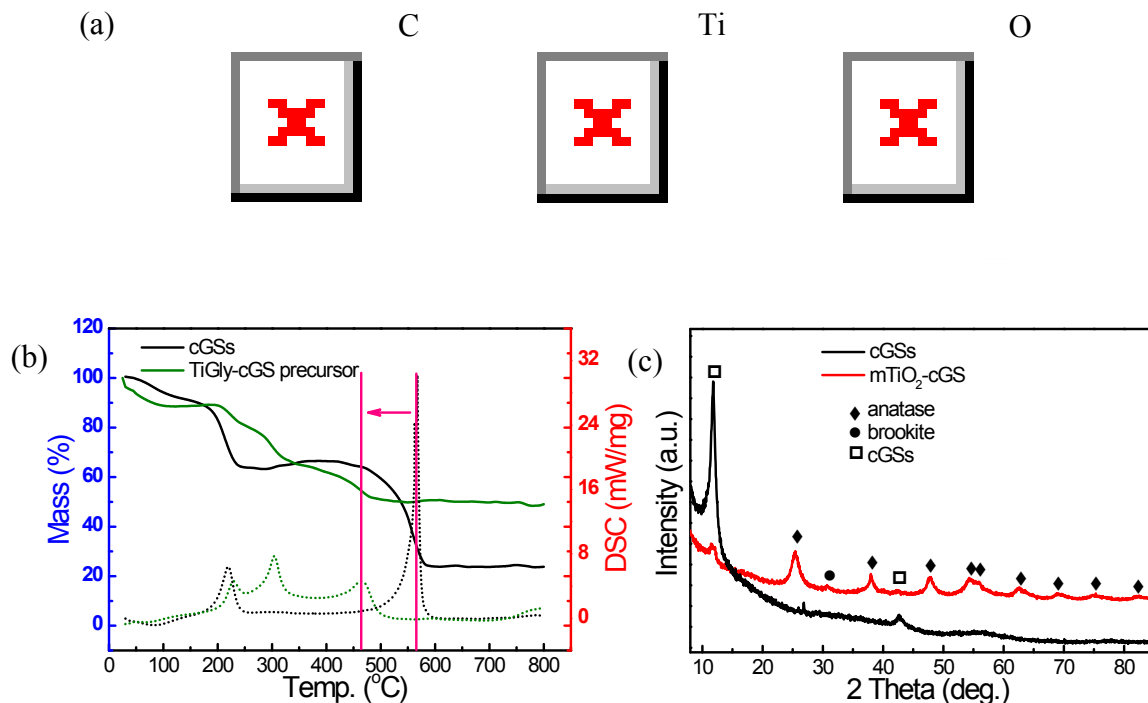

**Figure S6.** (a) Elemental mapping of the TiGly-cGS precursor. (b) TG-DSC curves of the cGSs and TiGly-cGS precursor. Clearly, the peak temperature of the exothermic oxidation of cGSs in TiGly-cGS precursor move ahead as much as 103 °C in comparison with that of the bare cGSs. This also indicates the uniformity of Ti glycolate on cGSs. (c) XRD spectra of the cGSs and mTiO<sub>2</sub>-cGS. Major anatase TiO<sub>2</sub> and cGSs together with a little brookite TiO<sub>2</sub> are identified. The peak observed at  $2\theta = 10.45^\circ$  is corresponding to an average interlayer spacing of  $\sim 0.78$  nm for the cGSs.
